# Supplementary material
Source: PubMed Central journal article supplement (PMC3512159)
Supplement: b1324bca0cedf8772f98972ab8831b25_genetics.112.145383-3.pdf [file b1324bca0cedf8772f98972ab8831b25_genetics.112.145383-3.pdf]

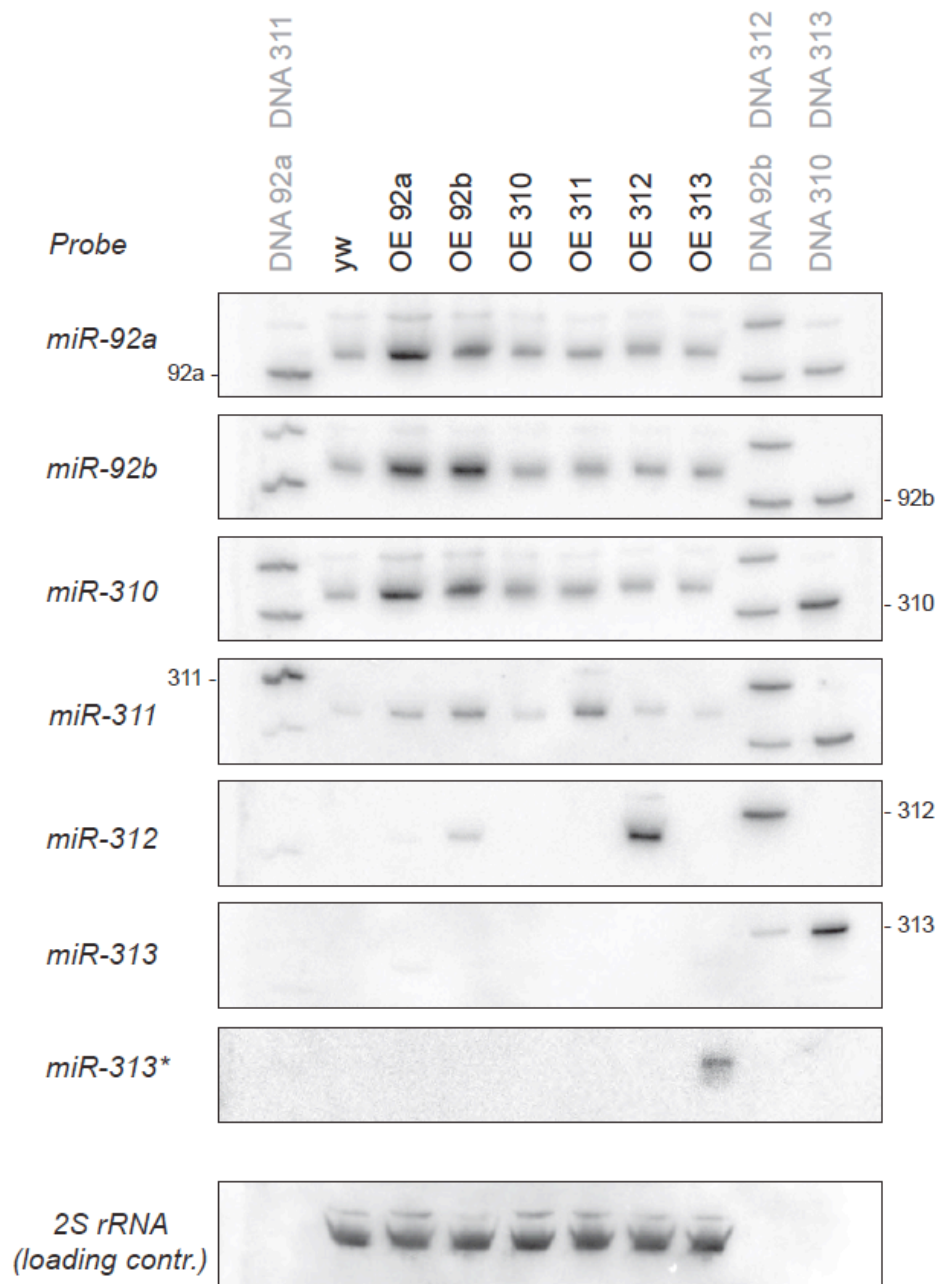

**Figure S1** Expression analysis of the miR-92 family in wing discs. Northern Blot analysis of total RNA from third instar wing imaginal discs of *MS1096-Gal4* driven miRNAs of all six members of the miR-92 family. Reverse complementary DNA oligonucleotides were used as probes. DNA mimics of the indicated miRNAs (5 fmol each) were loaded in lanes 1, 9 and 10 as positive controls and to verify cross hybridization except for *miR-313\**.
